# Supplementary material
Source: PubMed Central journal article supplement (PMC6070141)
Supplement: NIHMS78715-supplement-Supplementary_Information.pdf [file NIHMS78715-supplement-Supplementary_Information.pdf]

*Eur. J. Org. Chem.* • ISSN 1099–0690

<https://doi.org/10.1002/ejoc.201800199>

**SUPPORTING INFORMATION**

**Title:** Frogolide – An Unprecedented Sesquiterpene Macrolactone from Scent Glands of African Frogs

**Author(s):** Markus Menke, Kristina Melnik, Pardha S. Peram, Iris Starnberger, Walter Hödl, Miguel Vences, Stefan Schulz\*

## Contents

|                                                                                                                                                                                      |    |
|--------------------------------------------------------------------------------------------------------------------------------------------------------------------------------------|----|
| 1. $^1\text{H}$ NMR spectrum of (S,E)-2,3-dihydrofarnesol ( <b>8</b> )                                                                                                               | 3  |
| 2. $^{13}\text{C}$ NMR spectrum of (S,E)-2,3-dihydrofarnesol ( <b>8</b> )                                                                                                            | 4  |
| 3. $^1\text{H}$ NMR spectrum of Methyl (S,E)-2,3-dihydrofarnesoate ( <b>10</b> )                                                                                                     | 5  |
| 4. $^{13}\text{C}$ NMR spectrum of Methyl (S,E)-2,3-dihydrofarnesoate ( <b>10</b> )                                                                                                  | 6  |
| 5. $^1\text{H}$ NMR spectrum of Methyl (S,E)-12-hydroxy-2,3-dihydrofarnesoate ( <b>11</b> )                                                                                          | 7  |
| 6. $^{13}\text{C}$ NMR spectrum of Methyl (S,E)-12-hydroxy-2,3-dihydrofarnesoate ( <b>11</b> )                                                                                       | 8  |
| 7. $^1\text{H}$ NMR spectrum of frogolide ( <b>14</b> )                                                                                                                              | 9  |
| 8. $^{13}\text{C}$ NMR spectrum of frogolide ( <b>14</b> )                                                                                                                           | 10 |
| 9. Determination of the absolute configuration of frogolide by chiral gas chromatography in <i>Hyperolius viridiflavus</i> , <i>Guibemantis liber</i> and <i>Spinomantis aglavei</i> | 11 |

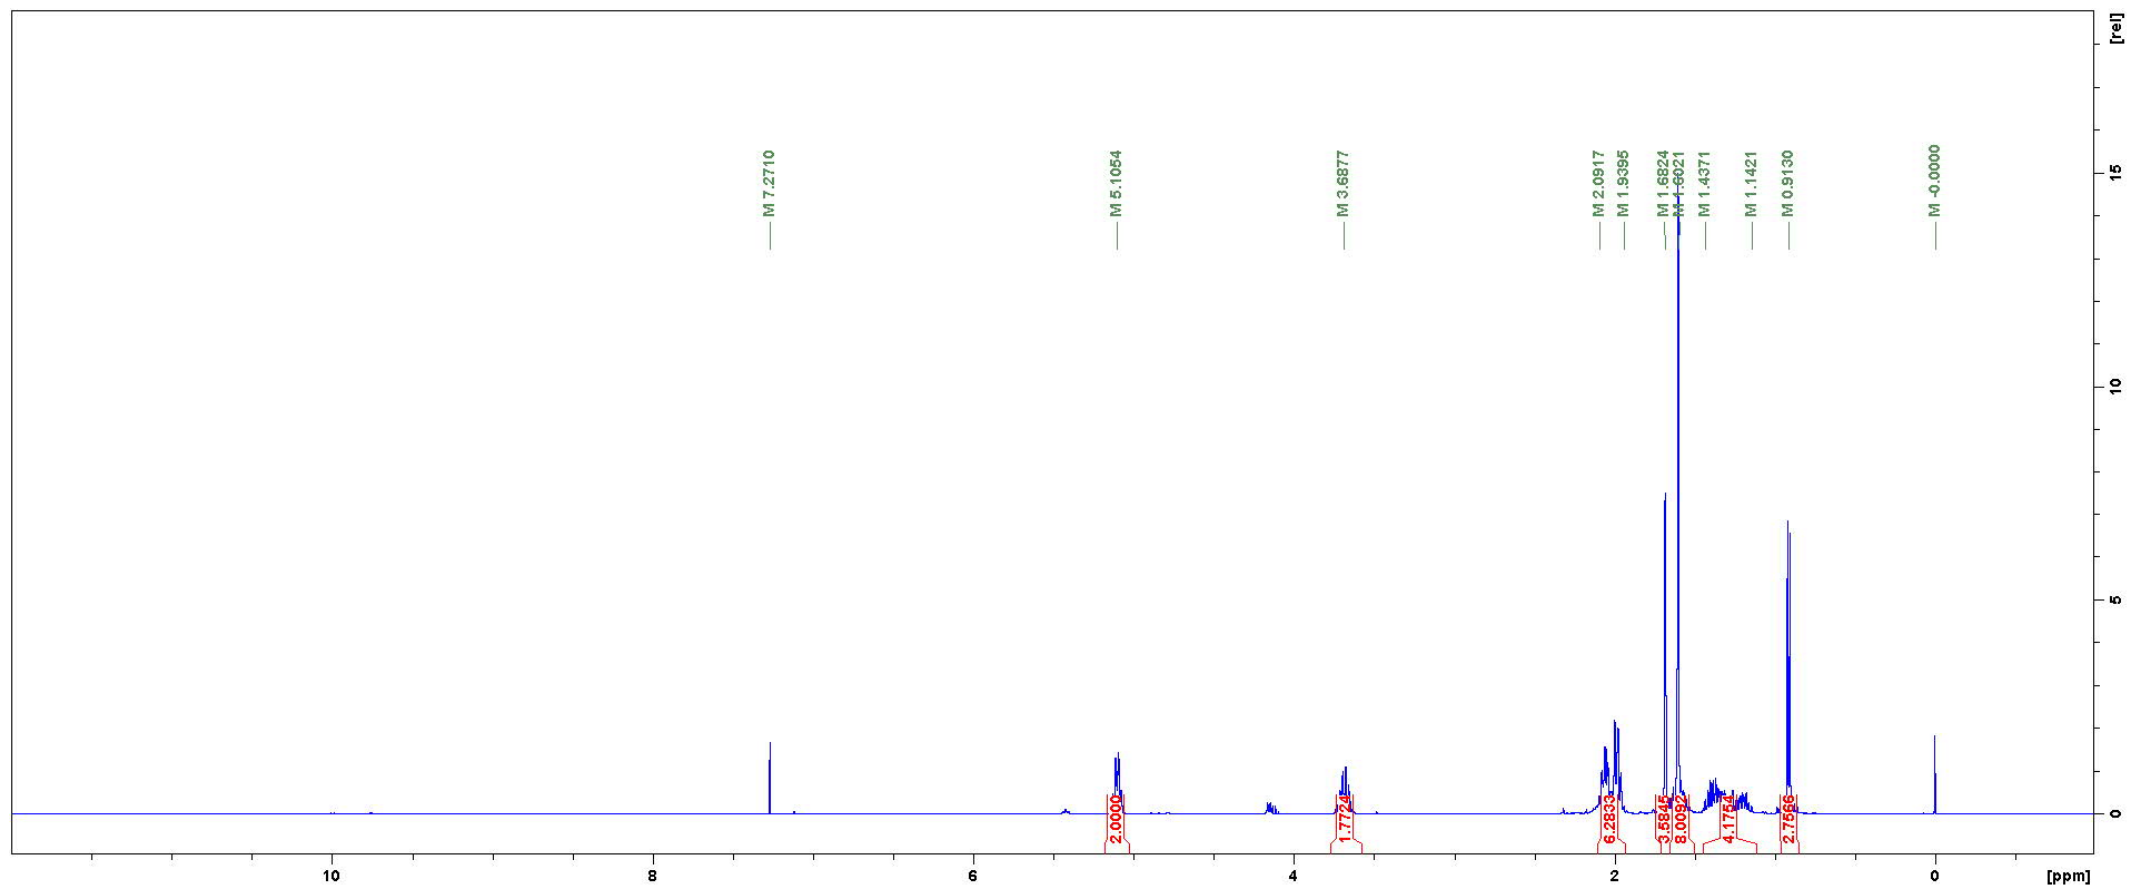

Figure S1: <sup>1</sup>H NMR spectrum of (S,E)-2,3-dihydrofarnesol (**8**)

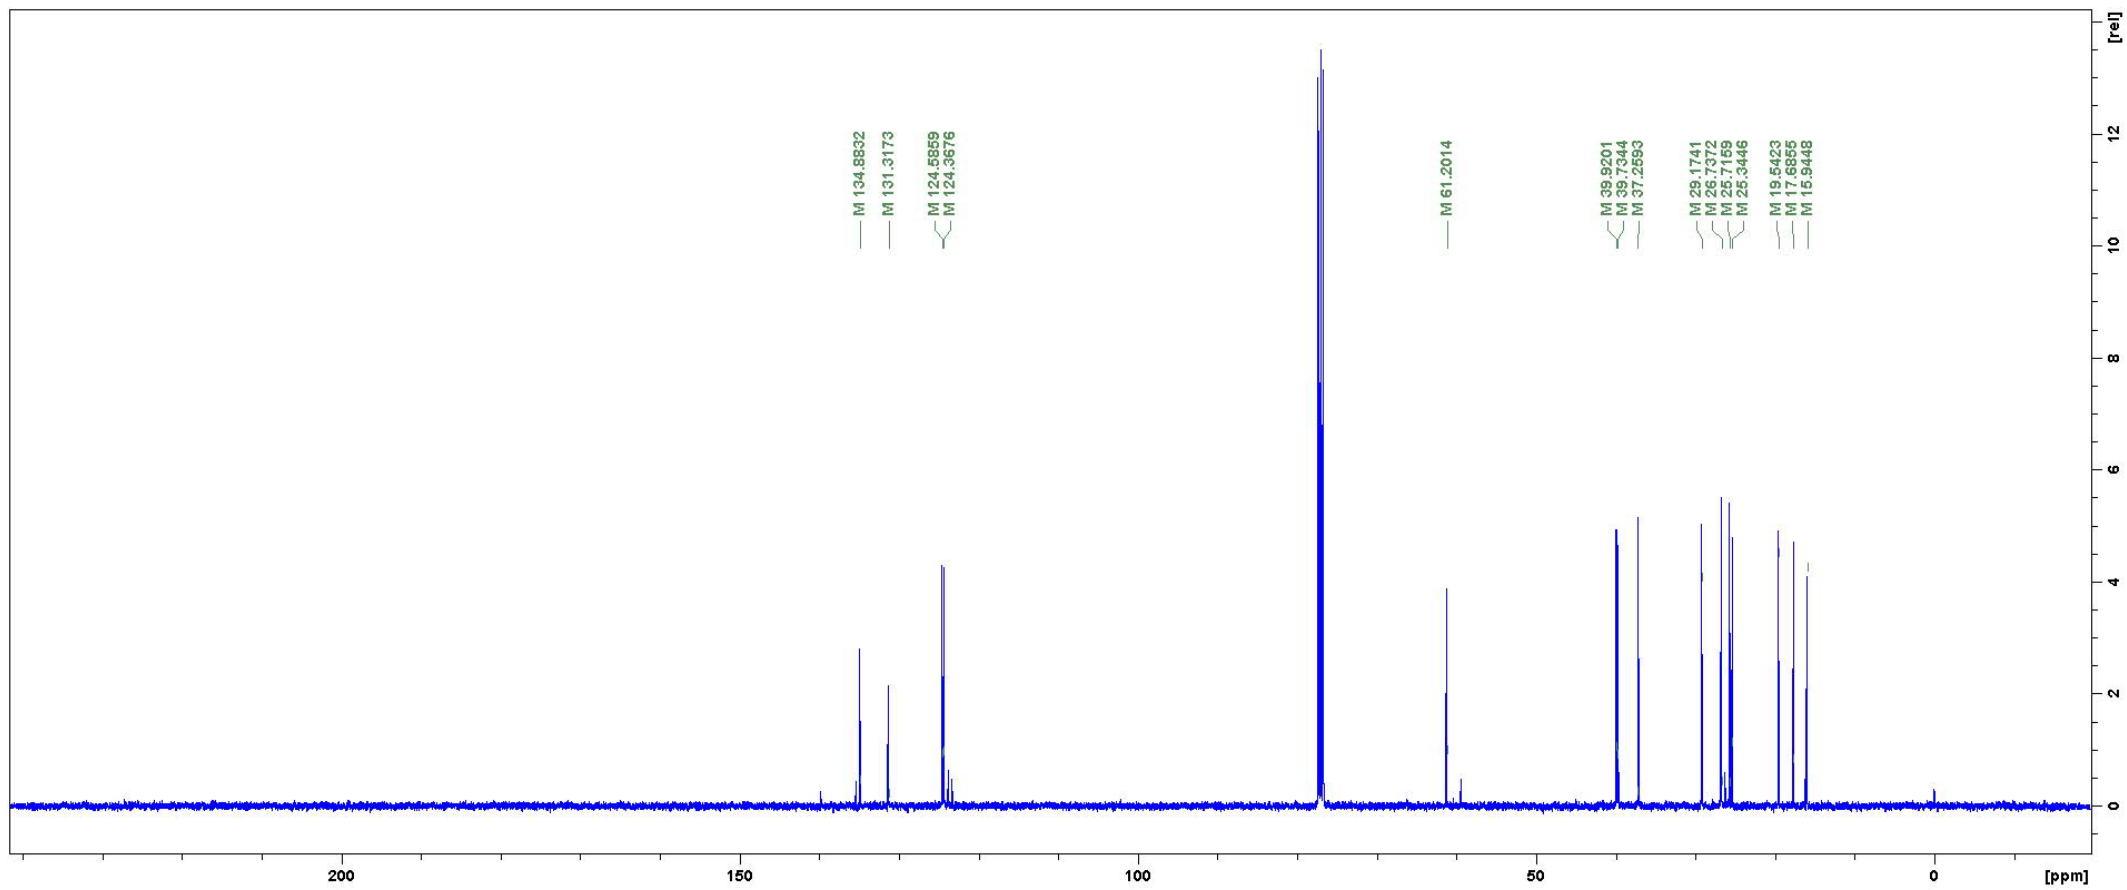

Figure S2: <sup>13</sup>C NMR spectrum of (*S,E*)-2,3-dihydrofarnesol (**8**)

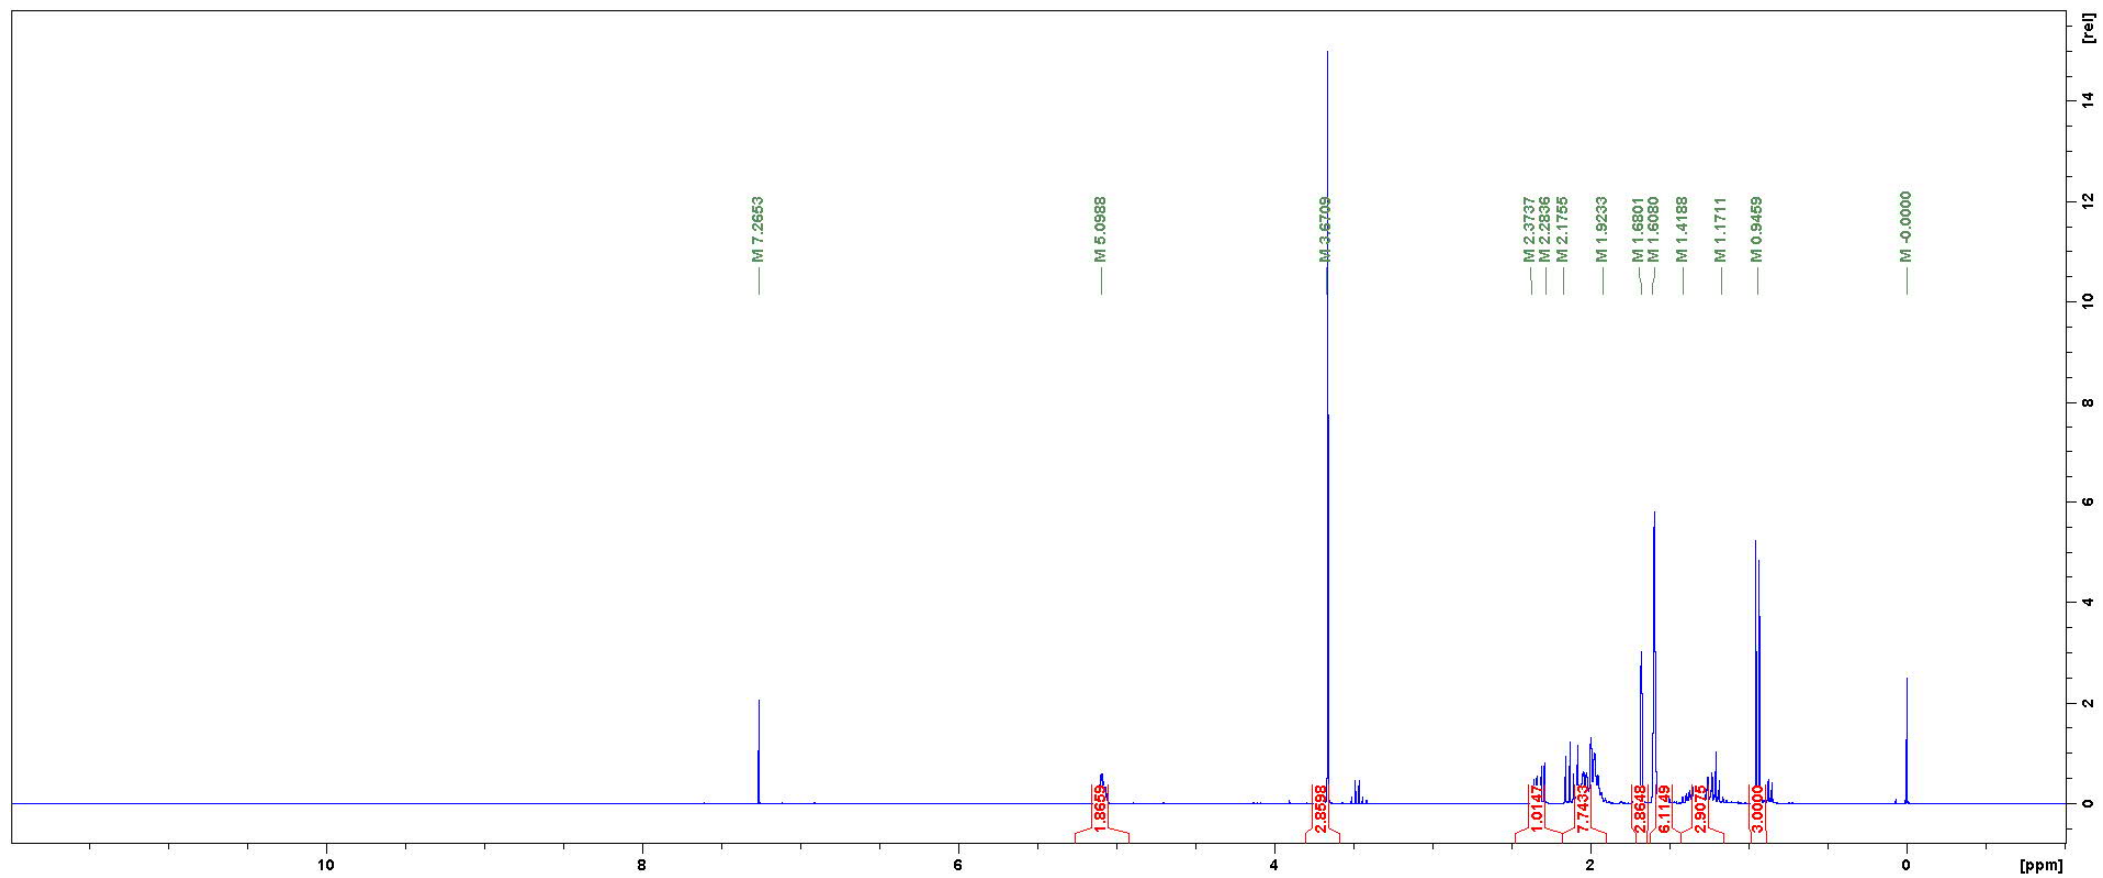

Figure S3:  $^1\text{H}$  NMR spectrum of Methyl (*S,E*)-2,3-dihydrofarnesenoate (**10**)

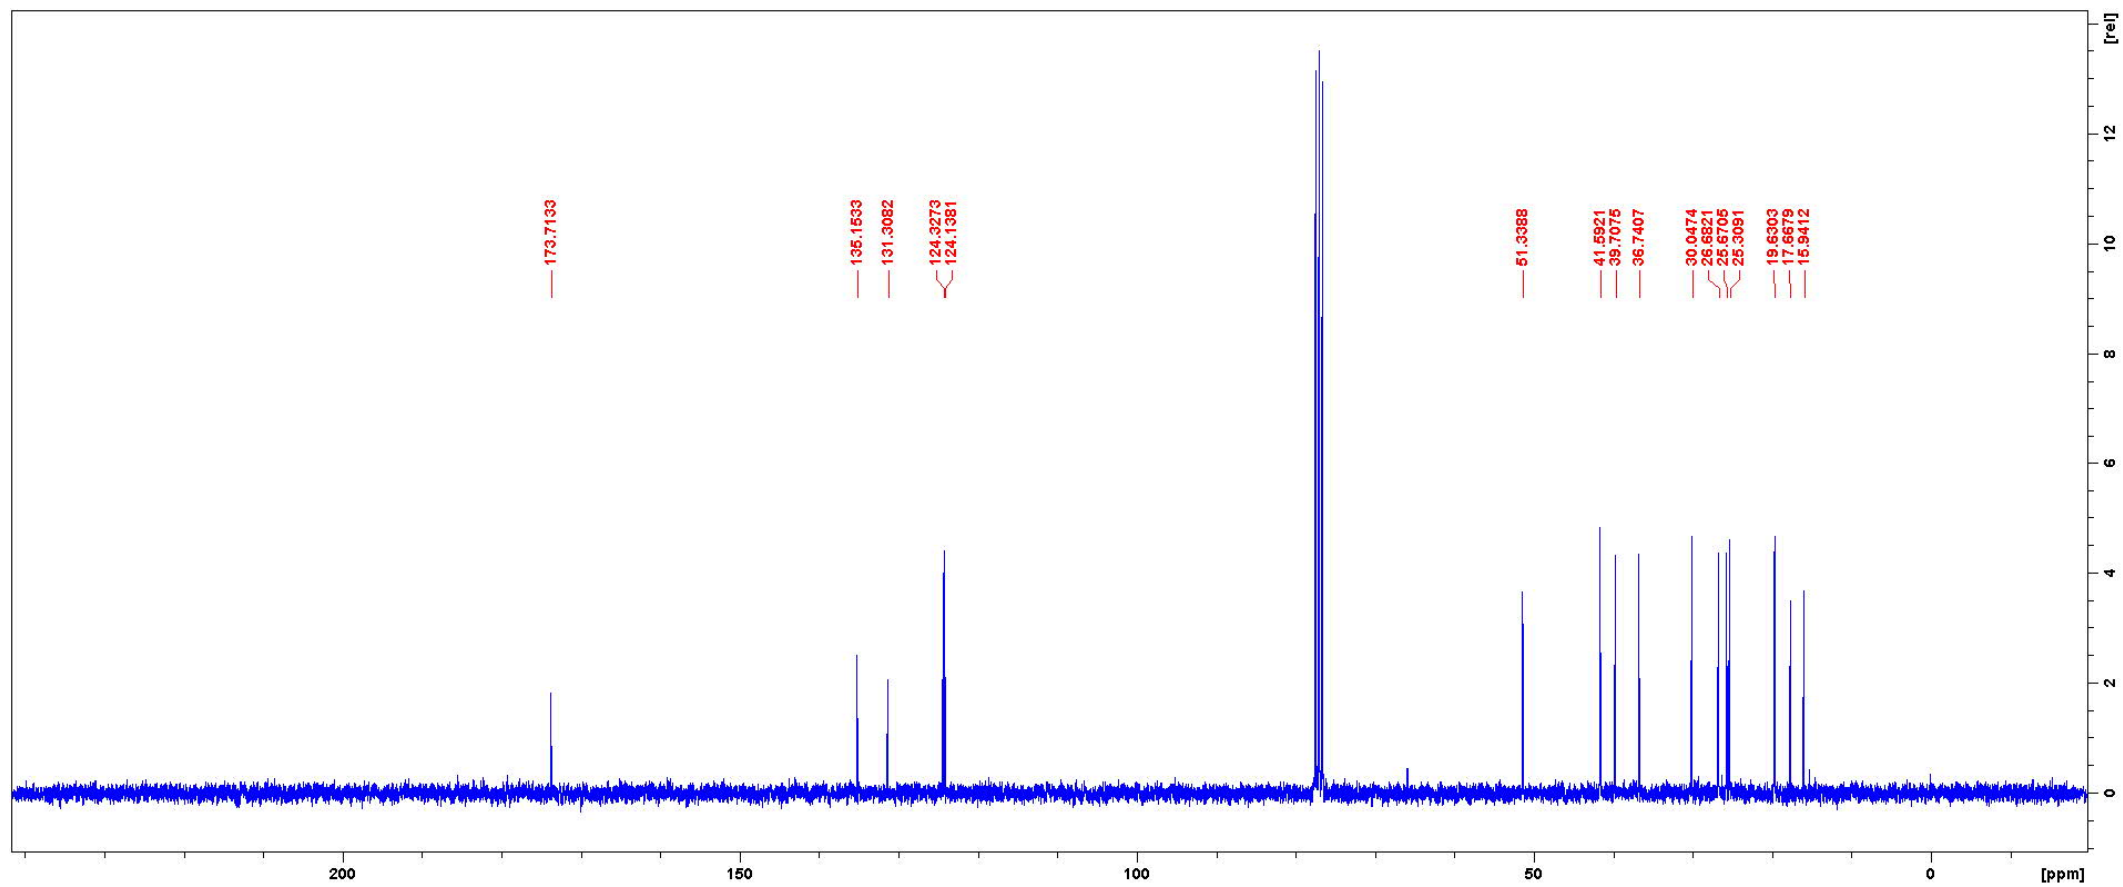

Figure S4: <sup>13</sup>C NMR spectrum of Methyl (S,E)-2,3-dihydrofarnesenoate (**10**)

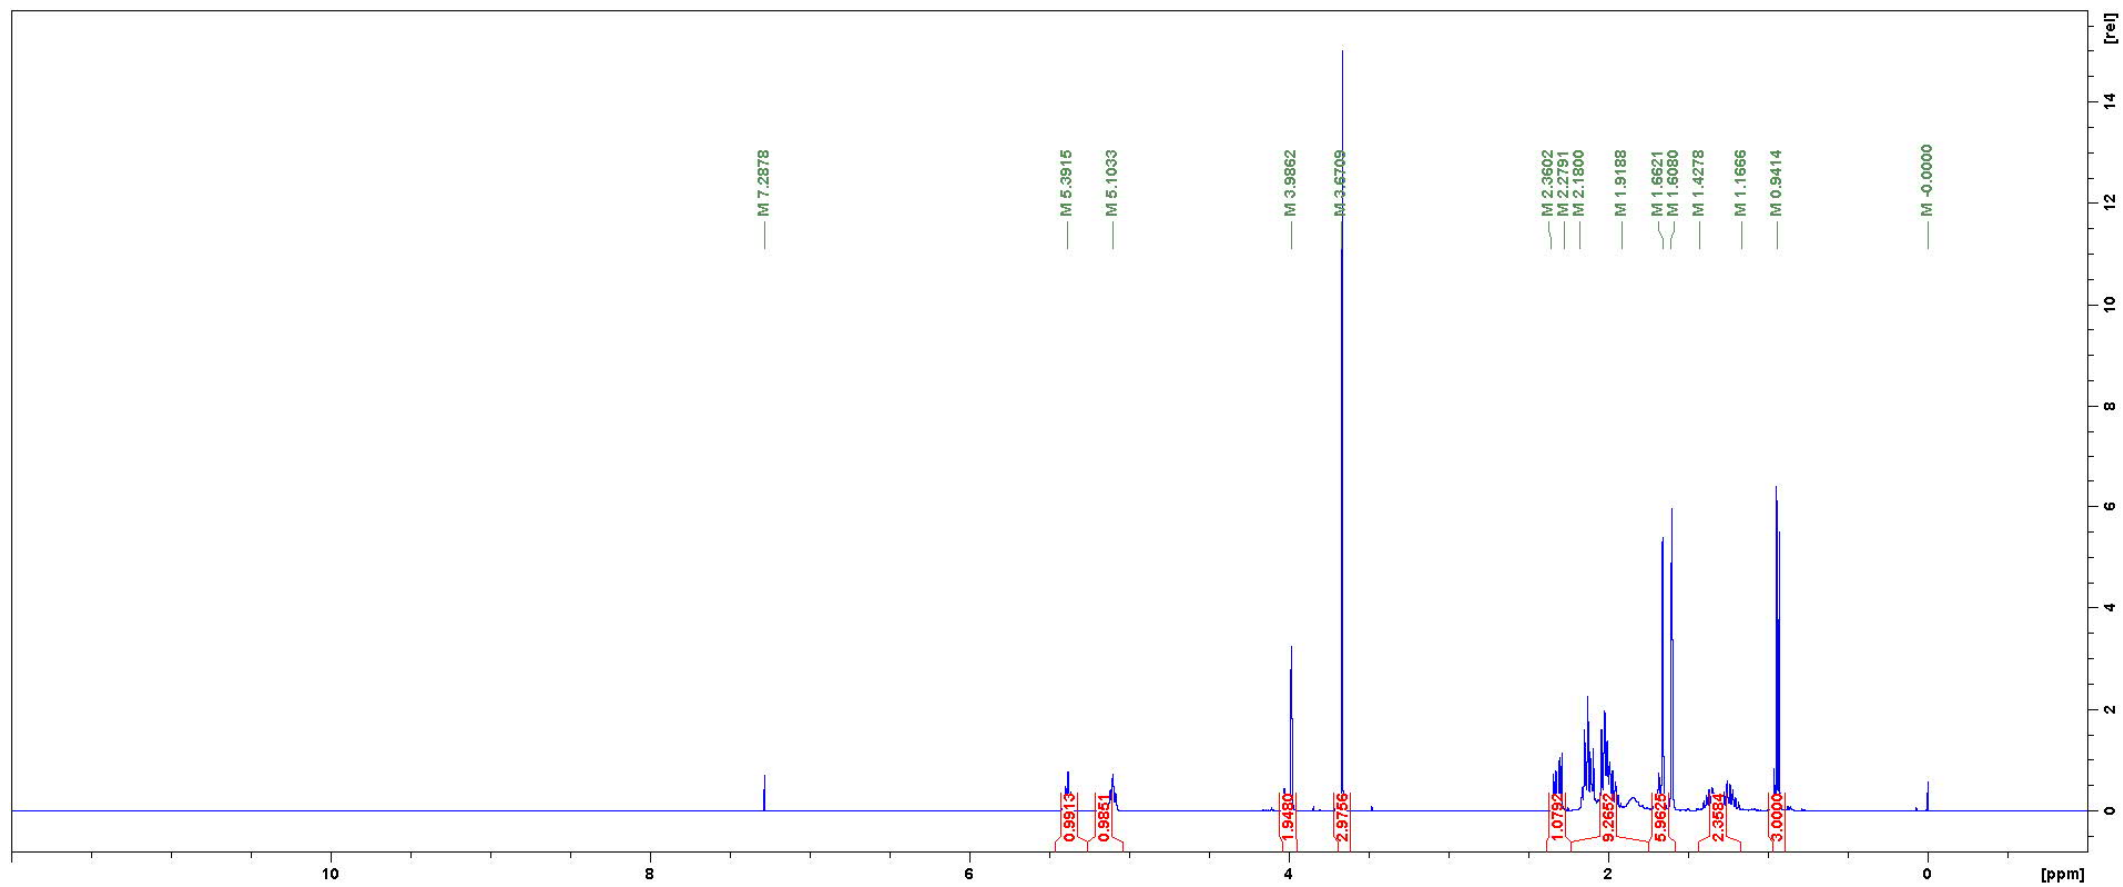

Figure S5: <sup>1</sup>H NMR spectrum of Methyl (3*S*,6*E*,10*E*)-12-hydroxy-2,3-dihydrofarnesenoate (**11**)

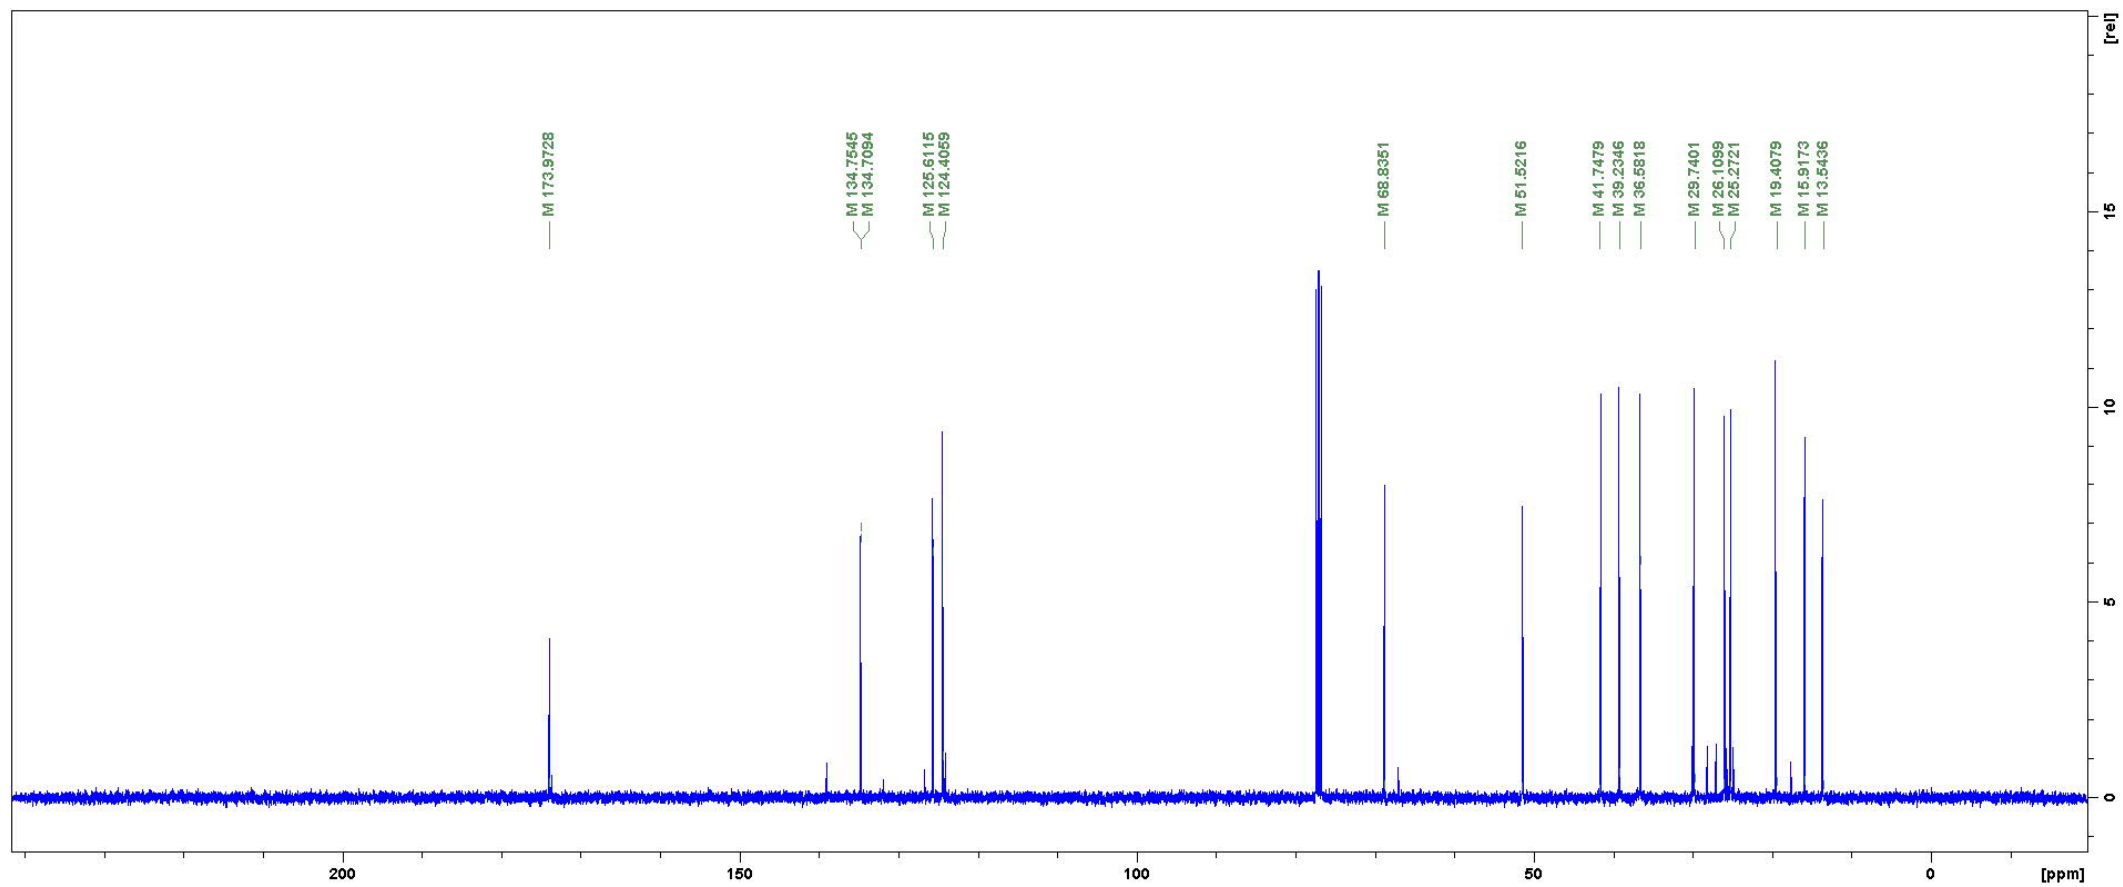

Figure S6: <sup>13</sup>C NMR spectrum of Methyl (3*S*,6*E*,10*E*)-12-hydroxy-2,3-dihydrofarnesenoate (**11**)



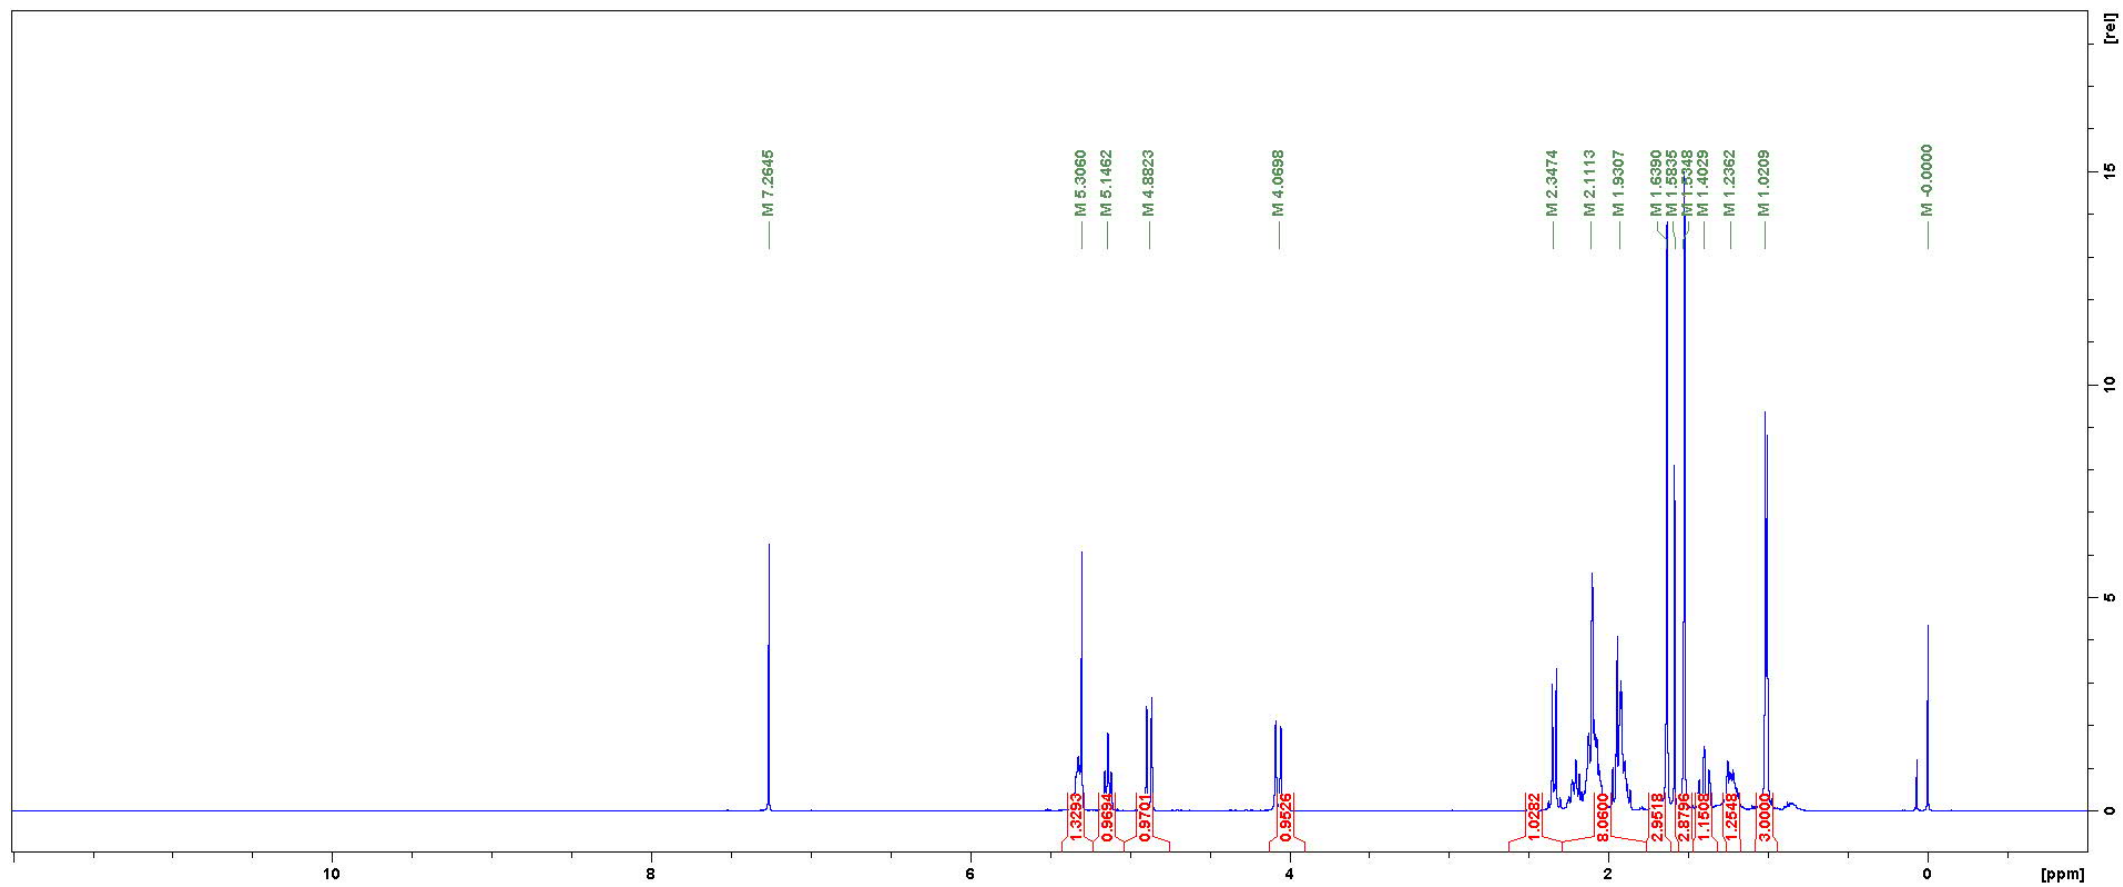

Figure S7: <sup>1</sup>H NMR spectrum of frogolide (**14**)

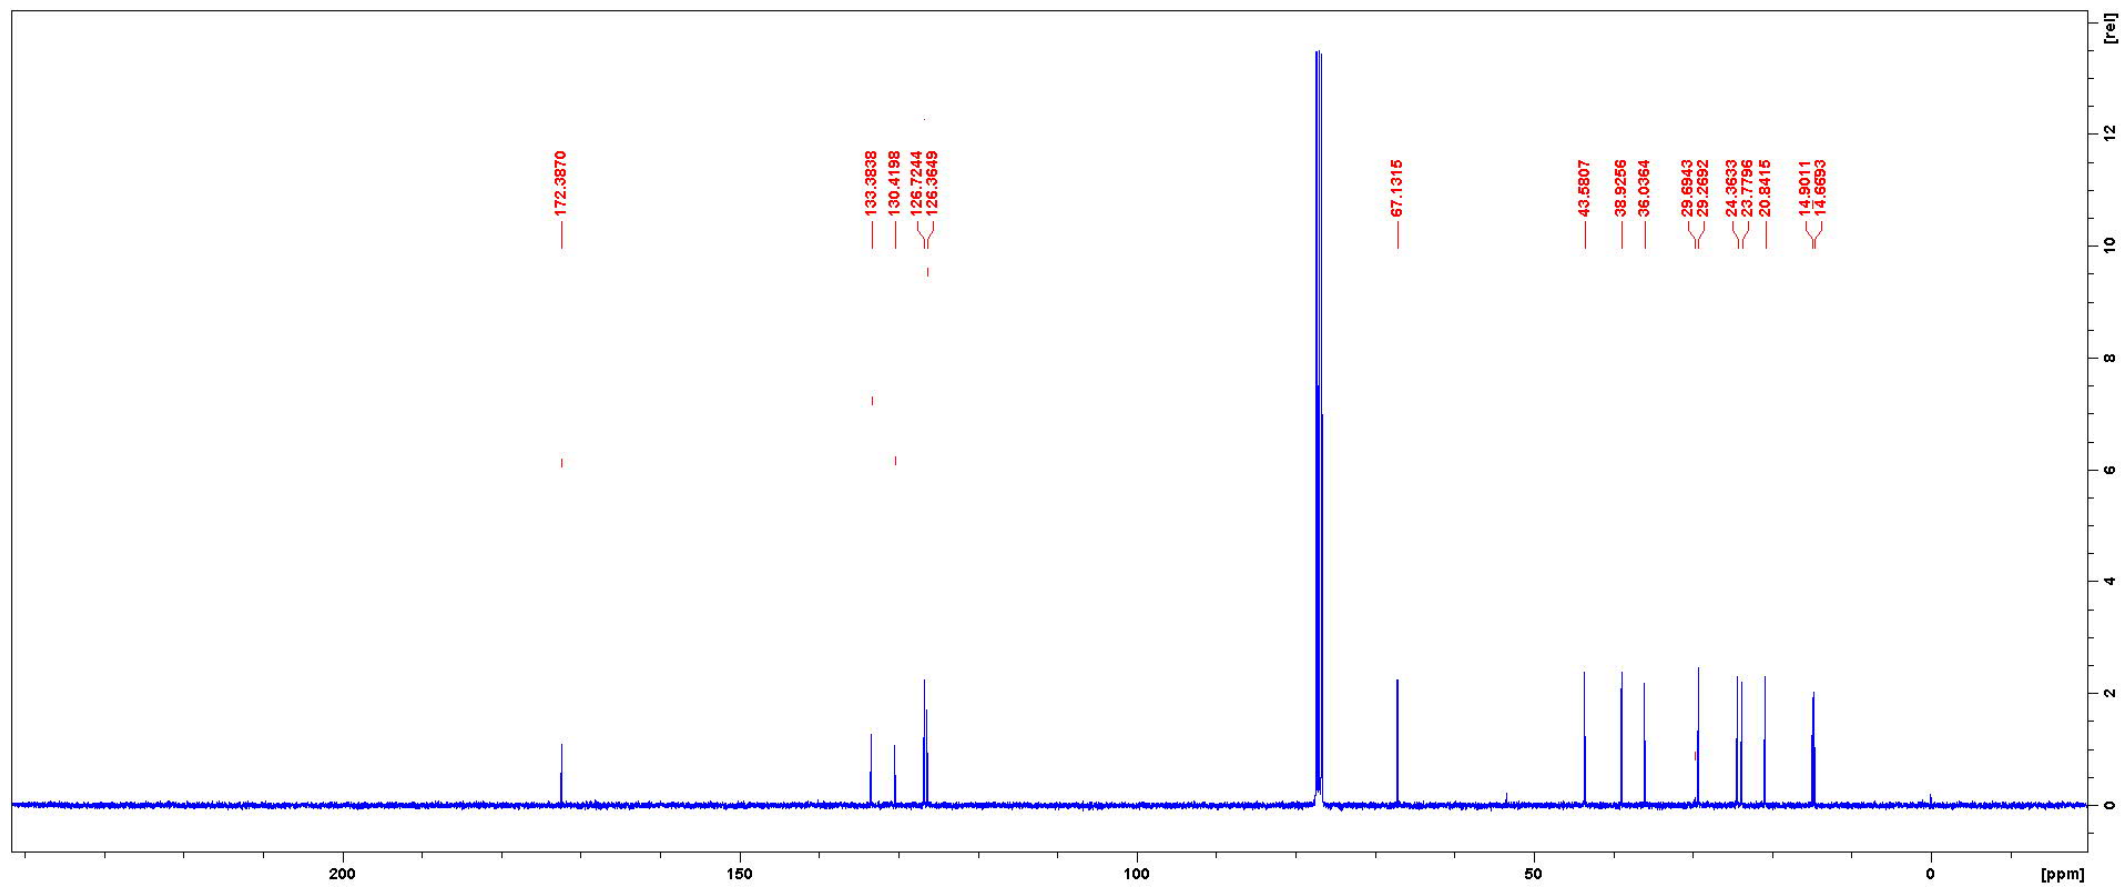

Figure S8: <sup>13</sup>C NMR spectrum of froglide (**14**)

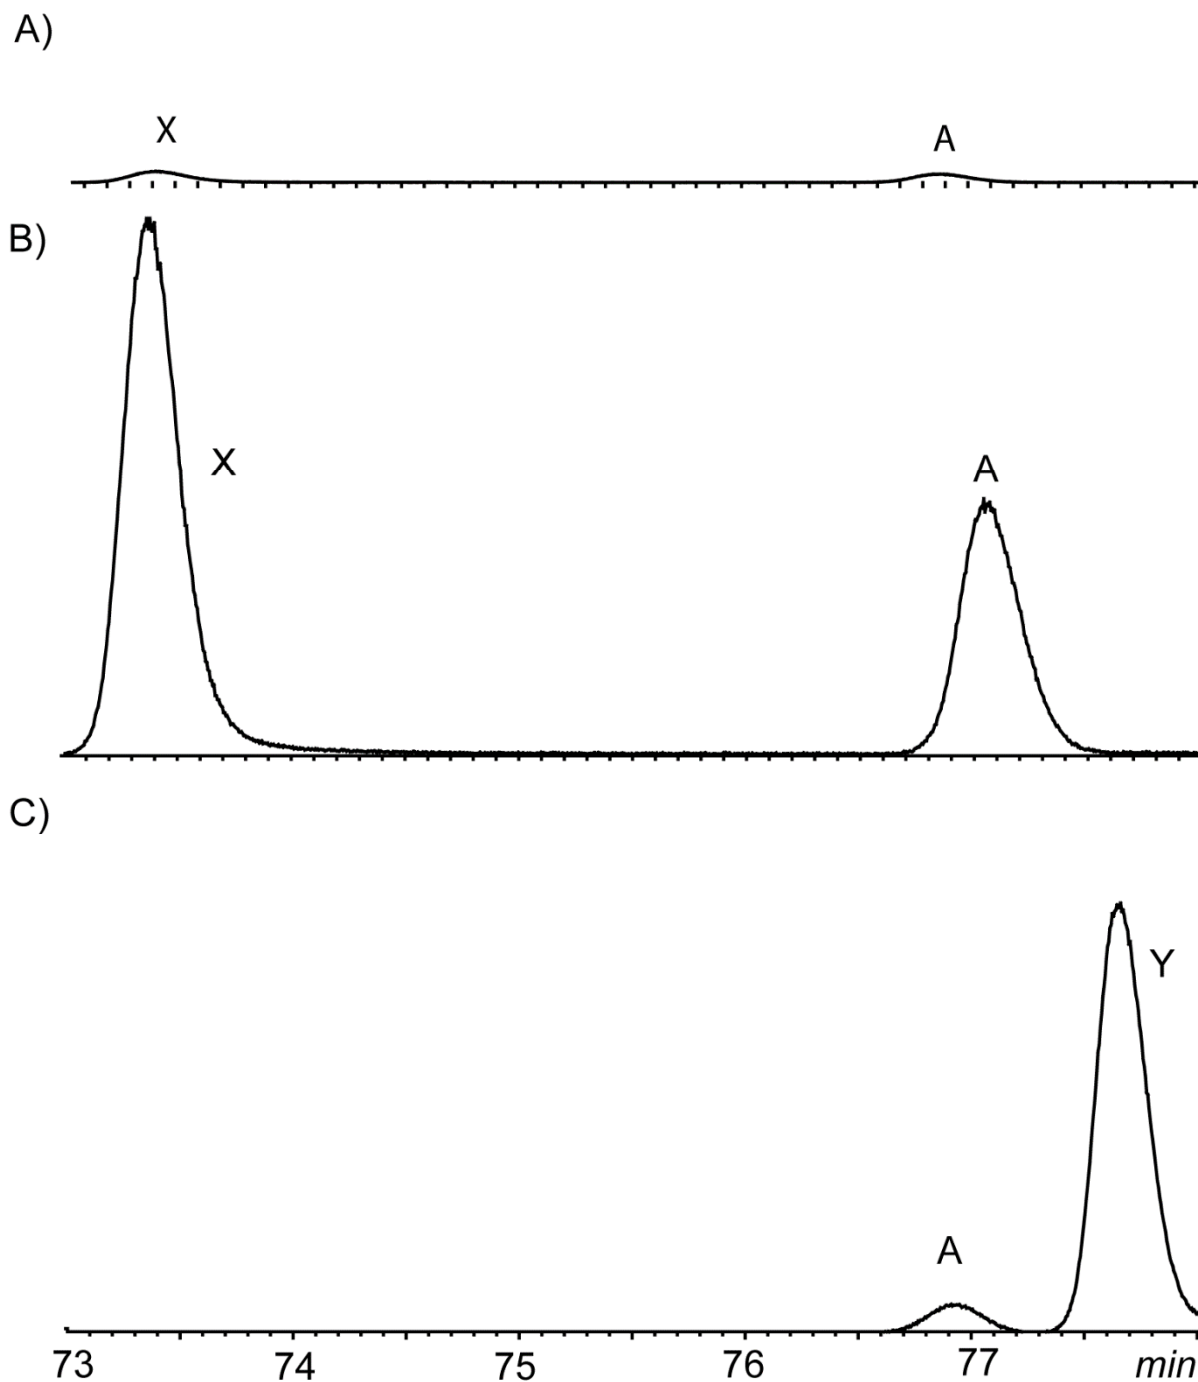

Figure S9: Total ion chromatogram of the gas chromatographic enantiomer separation of **14** on a chiral  $\beta$ -TBDMS-hydrodex phase. Temperature program: isothermal for 60 min at 110 °C, then with 2 °C/min to 160 °C, followed by a sharp ramp of 25 °C/min to 220 °C. A) *Spinomantis aglavei*; B) *Guibemantis liber*; C) *Hyperolius viridiflavus*; X: Ethyl 3-aminobenzoate; Y: unknown oxidized sesquiterpene. Peak identities were confirmed by GC/MS.
